# Supplementary material for: Influenza A Viruses in Whistling Ducks (Subfamily Dendrocygninae)
Source: Viruses. 2021 Jan 28;13(2):192. doi: 10.3390/v13020192 (PMC7911599; doi:10.3390/v13020192)
Supplement: Supplementary file 1 [file viruses-13-00192-s001.xlsx]

## Sheet: Sheet1
Supplementary Table 1. Antibody detection (bELISA) and virus isolation results for serum and swab samples collected in this study.
Sample ID	Genus, spp	Age	Sex	Date	County	State	S/N Ratio	IAV isolation status	Strain Name
18-399	Dendrocygna autumnalis	UNK1	UNK1	2018-02-17	Vermillion Parish	LA4	0.941713	NEG5	N/A7
18-400	Dendrocygna autumnalis	HY2	Male	2018-02-17	Vermillion Parish	LA	0.992511	NEG	N/A
18-401	Dendrocygna autumnalis	AHY3	Female	2018-02-17	Vermillion Parish	LA	0.715728	NEG	N/A
18-402	Dendrocygna autumnalis	AHY	Male	2018-02-17	Vermillion Parish	LA	0.989906	NEG	N/A
18-403	Dendrocygna autumnalis	HY	Male	2018-02-17	Vermillion Parish	LA	1.00098	NEG	N/A
18-404	Dendrocygna autumnalis	AHY	Male	2018-02-17	Vermillion Parish	LA	0.915663	NEG	N/A
18-405	Dendrocygna autumnalis	AHY	Male	2018-02-17	Vermillion Parish	LA	0.939759	NEG	N/A
18-406	Dendrocygna autumnalis	AHY	Male	2018-02-17	Vermillion Parish	LA	0.931293	NEG	N/A
18-407	Dendrocygna autumnalis	AHY	Female	2018-02-17	Vermillion Parish	LA	0.861609	NEG	N/A
18-408	Dendrocygna autumnalis	HY	Male	2018-02-17	Vermillion Parish	LA	0.95604	NEG	N/A
18-409	Dendrocygna autumnalis	AHY	Female	2018-02-17	Vermillion Parish	LA	0.921524	NEG	N/A
18-410	Dendrocygna autumnalis	HY	Male	2018-02-17	Vermillion Parish	LA	0.916314	NEG	N/A
18-411	Dendrocygna autumnalis	AHY	Female	2018-02-17	Vermillion Parish	LA	0.942364	NEG	N/A
18-412	Dendrocygna autumnalis	HY	Male	2018-02-17	Vermillion Parish	LA	0.842722	NEG	N/A
18-413	Dendrocygna autumnalis	HY	Male	2018-02-17	Vermillion Parish	LA	0.938457	NEG	N/A
18-414	Dendrocygna autumnalis	AHY	Female	2018-02-17	Vermillion Parish	LA	0.959948	NEG	N/A
18-415	Dendrocygna autumnalis	AHY	Male	2018-02-17	Vermillion Parish	LA	0.977532	NEG	N/A
18-416	Dendrocygna autumnalis	AHY	Male	2018-02-17	Vermillion Parish	LA	0.949528	NEG	N/A
18-417	Dendrocygna autumnalis	AHY	Female	2018-02-17	Vermillion Parish	LA	0.930641	NEG	N/A
18-418	Dendrocygna autumnalis	AHY	Female	2018-02-17	Vermillion Parish	LA	0.860957	NEG	N/A
18-419	Dendrocygna autumnalis	HY	Female	2018-02-17	Vermillion Parish	LA	0.935852	NEG	N/A
18-420	Dendrocygna autumnalis	AHY	Female	2018-02-17	Vermillion Parish	LA	0.960599	NEG	N/A
18-421	Dendrocygna autumnalis	HY	Male	2018-02-17	Vermillion Parish	LA	0.858352	POS6	A/Black-bellied Whistling-Duck/Louisiana/UGAI18-484/2018(H10N7)
18-422	Dendrocygna autumnalis	HY	Male	2018-02-17	Vermillion Parish	LA	0.968951	NEG	N/A
18-423	Dendrocygna autumnalis	HY	Male	2018-02-17	Vermillion Parish	LA	0.720287	NEG	N/A
18-424	Dendrocygna autumnalis	HY	Male	2018-02-17	Vermillion Parish	LA	0.83621	NEG	N/A
18-425	Dendrocygna autumnalis	HY	Male	2018-02-17	Vermillion Parish	LA	1.24845	NEG	N/A
18-426	Dendrocygna autumnalis	AHY	Female	2018-02-17	Vermillion Parish	LA	1.49137	NEG	N/A
18-427	Dendrocygna autumnalis	AHY	Female	2018-02-17	Vermillion Parish	LA	0.994464	NEG	N/A
18-428	Dendrocygna autumnalis	AHY	Male	2018-02-17	Vermillion Parish	LA	0.987301	NEG	N/A
18-429	Dendrocygna autumnalis	AHY	Female	2018-02-17	Vermillion Parish	LA	0.563334	NEG	N/A
18-430	Dendrocygna autumnalis	HY	Male	2018-02-17	Vermillion Parish	LA	0.998372	NEG	N/A
18-431	Dendrocygna autumnalis	AHY	Female	2018-02-17	Vermillion Parish	LA	0.932595	NEG	N/A
18-432	Dendrocygna autumnalis	AHY	Female	2018-02-17	Vermillion Parish	LA	0.948225	NEG	N/A
18-433	Dendrocygna autumnalis	HY	Male	2018-02-17	Vermillion Parish	LA	0.823185	NEG	N/A
18-434	Dendrocygna autumnalis	HY	Male	2018-02-17	Vermillion Parish	LA	0.886356	NEG	N/A
18-435	Dendrocygna autumnalis	HY	Male	2018-02-17	Vermillion Parish	LA	1.47248	NEG	N/A
18-436	Dendrocygna autumnalis	AHY	Male	2018-02-17	Vermillion Parish	LA	0.24378	NEG	N/A
18-437	Dendrocygna autumnalis	HY	Female	2018-02-17	Vermillion Parish	LA	1.08369	NEG	N/A
18-438	Dendrocygna autumnalis	AHY	Male	2018-02-17	Vermillion Parish	LA	1.49267	NEG	N/A
18-439	Dendrocygna autumnalis	HY	Male	2018-02-17	Vermillion Parish	LA	1.11364	NEG	N/A
18-440	Dendrocygna autumnalis	AHY	Male	2018-02-17	Vermillion Parish	LA	1.05633	NEG	N/A
18-441	Dendrocygna autumnalis	HY	Male	2018-02-17	Vermillion Parish	LA	1.3481	NEG	N/A
18-442	Dendrocygna autumnalis	AHY	Male	2018-02-17	Vermillion Parish	LA	1.2973	NEG	N/A
18-443	Dendrocygna autumnalis	HY	Male	2018-02-17	Vermillion Parish	LA	1.02117	NEG	N/A
18-444	Dendrocygna autumnalis	UNK	UNK	2018-02-17	Vermillion Parish	LA	0.999674	NEG	N/A
18-445	Dendrocygna autumnalis	AHY	Male	2018-02-17	Vermillion Parish	LA	0.832302	NEG	N/A
18-446	Dendrocygna autumnalis	AHY	Male	2018-02-17	Vermillion Parish	LA	0.743732	NEG	N/A
18-447	Dendrocygna autumnalis	AHY	Female	2018-02-17	Vermillion Parish	LA	0.946272	NEG	N/A
18-448	Dendrocygna autumnalis	AHY	Male	2018-02-17	Vermillion Parish	LA	0.944969	NEG	N/A
18-449	Dendrocygna autumnalis	HY	Female	2018-02-17	Vermillion Parish	LA	1.11234	NEG	N/A
18-450	Dendrocygna autumnalis	AHY	Female	2018-02-17	Vermillion Parish	LA	1.26994	NEG	N/A
18-451	Dendrocygna autumnalis	HY	Male	2018-02-17	Vermillion Parish	LA	1.17226	NEG	N/A
18-452	Dendrocygna autumnalis	AHY	Female	2018-02-17	Vermillion Parish	LA	1.32	NEG	N/A
18-453	Dendrocygna autumnalis	HY	Female	2018-02-17	Vermillion Parish	LA	1.01921	NEG	N/A
18-454	Dendrocygna autumnalis	HY	Female	2018-02-17	Vermillion Parish	LA	1.05959	NEG	N/A
18-455	Dendrocygna autumnalis	HY	Male	2018-02-17	Vermillion Parish	LA	1.02638	NEG	N/A
18-456	Dendrocygna autumnalis	HY	Female	2018-02-17	Vermillion Parish	LA	1.38391	NEG	N/A
18-457	Dendrocygna autumnalis	HY	Female	2018-02-17	Vermillion Parish	LA	1.54803	NEG	N/A
18-458	Dendrocygna autumnalis	HY	Male	2018-02-17	Vermillion Parish	LA	1.41387	NEG	N/A
18-459	Dendrocygna autumnalis	HY	Female	2018-02-17	Vermillion Parish	LA	1.59362	NEG	N/A
18-460	Dendrocygna autumnalis	HY	Male	2018-02-17	Vermillion Parish	LA	1.12081	NEG	N/A
18-461	Dendrocygna autumnalis	AHY	Male	2018-02-17	Vermillion Parish	LA	1.68284	NEG	N/A
18-462	Dendrocygna autumnalis	HY	Female	2018-02-17	Vermillion Parish	LA	1.25822	NEG	N/A
18-463	Dendrocygna autumnalis	HY	Female	2018-02-17	Vermillion Parish	LA	1.65093	NEG	N/A
18-464	Dendrocygna autumnalis	HY	Female	2018-02-17	Vermillion Parish	LA	1.35917	NEG	N/A
18-465	Dendrocygna autumnalis	HY	Male	2018-02-17	Vermillion Parish	LA	1.14425	NEG	N/A
18-466	Dendrocygna autumnalis	HY	Male	2018-02-17	Vermillion Parish	LA	1.12993	NEG	N/A
18-467	Dendrocygna autumnalis	AHY	Female	2018-02-17	Vermillion Parish	LA	1.03549	NEG	N/A
18-468	Dendrocygna autumnalis	HY	Female	2018-02-17	Vermillion Parish	LA	1.03484	NEG	N/A
18-469	Dendrocygna autumnalis	HY	Male	2018-02-17	Vermillion Parish	LA	0.625855	NEG	N/A
18-470	Dendrocygna autumnalis	HY	Male	2018-02-17	Vermillion Parish	LA	1.29274	NEG	N/A
18-471	Dendrocygna autumnalis	HY	Male	2018-02-17	Vermillion Parish	LA	1.25887	NEG	N/A
18-472	Dendrocygna autumnalis	HY	Female	2018-02-17	Vermillion Parish	LA	1.0113	NEG	N/A
18-473	Dendrocygna autumnalis	HY	Male	2018-02-17	Vermillion Parish	LA	1.40671	NEG	N/A
18-474	Dendrocygna autumnalis	HY	Male	2018-02-17	Vermillion Parish	LA	0.930641	NEG	N/A
18-475	Dendrocygna autumnalis	AHY	Female	2018-02-17	Vermillion Parish	LA	1.43406	NEG	N/A
18-476	Dendrocygna autumnalis	HY	Male	2018-02-17	Vermillion Parish	LA	1.45295	NEG	N/A
18-477	Dendrocygna autumnalis	HY	Female	2018-02-17	Vermillion Parish	LA	1.19375	NEG	N/A
18-478	Dendrocygna autumnalis	HY	Female	2018-02-17	Vermillion Parish	LA	1.05243	NEG	N/A
18-479	Dendrocygna autumnalis	HY	Female	2018-02-17	Vermillion Parish	LA	1.27906	NEG	N/A
18-480	Dendrocygna autumnalis	HY	Male	2018-02-17	Vermillion Parish	LA	1.18398	NEG	N/A
18-481	Dendrocygna autumnalis	HY	Female	2018-02-17	Vermillion Parish	LA	0.94562	NEG	N/A
18-482	Dendrocygna autumnalis	HY	Male	2018-02-17	Vermillion Parish	LA	1.46597	NEG	N/A
18-483	Dendrocygna autumnalis	HY	Male	2018-02-17	Vermillion Parish	LA	1.29534	NEG	N/A
18-484	Dendrocygna autumnalis	AHY	Male	2018-02-17	Vermillion Parish	LA	1.43276	NEG	N/A
18-485	Dendrocygna autumnalis	HY	Female	2018-02-17	Vermillion Parish	LA	1.46727	NEG	N/A
18-486	Dendrocygna autumnalis	AHY	Female	2018-02-17	Vermillion Parish	LA	1.32856	NEG	N/A
18-487	Dendrocygna autumnalis	AHY	Male	2018-02-17	Vermillion Parish	LA	1.34223	NEG	N/A
18-488	Dendrocygna autumnalis	HY	Male	2018-02-17	Vermillion Parish	LA	1.28623	NEG	N/A
18-489	Dendrocygna autumnalis	HY	Female	2018-02-17	Vermillion Parish	LA	1.75513	NEG	N/A
18-490	Dendrocygna autumnalis	HY	Male	2018-02-17	Vermillion Parish	LA	1.2491	NEG	N/A
19-172	Dendrocygna autumnalis	AHY	Female	2019-02-10	Jefferson Parish	LA	0.794069	NEG	N/A
19-173	Dendrocygna autumnalis	AHY	Female	2019-02-10	Jefferson Parish	LA	0.930807	NEG	N/A
19-174	Dendrocygna autumnalis	AHY	Female	2019-02-10	Jefferson Parish	LA	1.18287	NEG	N/A
19-175	Dendrocygna autumnalis	HY	Male	2019-02-10	Jefferson Parish	LA	1.06837	NEG	N/A
19-176	Dendrocygna autumnalis	AHY	Female	2019-02-10	Jefferson Parish	LA	1.08072	NEG	N/A
19-177	Dendrocygna autumnalis	HY	Male	2019-02-10	Jefferson Parish	LA	1.30313	NEG	N/A
19-178	Dendrocygna autumnalis	AHY	Male	2019-02-10	Jefferson Parish	LA	1.6804	NEG	N/A
19-179	Dendrocygna autumnalis	HY	Female	2019-02-10	Jefferson Parish	LA	0.976936	NEG	N/A
19-180	Dendrocygna autumnalis	AHY	Female	2019-02-10	Jefferson Parish	LA	1.33679	NEG	N/A
19-181	Dendrocygna autumnalis	HY	Male	2019-02-10	Jefferson Parish	LA	1.35255	NEG	N/A
19-182	Dendrocygna autumnalis	AHY	Female	2019-02-10	Jefferson Parish	LA	1.39044	NEG	N/A
19-183	Dendrocygna autumnalis	HY	Male	2019-02-10	Jefferson Parish	LA	1.33608	NEG	N/A
19-184	Dendrocygna autumnalis	AHY	Male	2019-02-10	Jefferson Parish	LA	0.782537	NEG	N/A
19-185	Dendrocygna autumnalis	AHY	Female	2019-02-10	Jefferson Parish	LA	1.08567	NEG	N/A
19-186	Dendrocygna autumnalis	AHY	Female	2019-02-10	Jefferson Parish	LA	0.857496	NEG	N/A
19-187	Dendrocygna autumnalis	AHY	Female	2019-02-10	Jefferson Parish	LA	1.03789	NEG	N/A
19-188	Dendrocygna autumnalis	HY	Female	2019-02-10	Jefferson Parish	LA	1.02471	NEG	N/A
19-189	Dendrocygna autumnalis	HY	Female	2019-02-10	Jefferson Parish	LA	1.47776	NEG	N/A
19-190	Dendrocygna autumnalis	HY	Male	2019-02-10	Jefferson Parish	LA	1.50824	NEG	N/A
19-191	Dendrocygna autumnalis	AHY	Male	2019-02-10	Jefferson Parish	LA	0.877265	NEG	N/A
19-192	Dendrocygna autumnalis	HY	Female	2019-02-10	Jefferson Parish	LA	1.22323	NEG	N/A
19-193	Dendrocygna autumnalis	AHY	Male	2019-02-10	Jefferson Parish	LA	0.467875	NEG	N/A
19-194	Dendrocygna autumnalis	HY	Male	2019-02-10	Jefferson Parish	LA	0.934926	NEG	N/A
19-195	Dendrocygna autumnalis	AHY	Male	2019-02-10	Jefferson Parish	LA	1.11367	NEG	N/A
19-196	Dendrocygna autumnalis	HY	Male	2019-02-10	Jefferson Parish	LA	1.14415	NEG	N/A
19-197	Dendrocygna autumnalis	HY	Female	2019-02-10	Jefferson Parish	LA	0.848435	NEG	N/A
19-198	Dendrocygna autumnalis	AHY	Female	2019-02-10	Jefferson Parish	LA	1.24217	NEG	N/A
19-199	Dendrocygna autumnalis	HY	Male	2019-02-10	Jefferson Parish	LA	1.17628	NEG	N/A
19-200	Dendrocygna autumnalis	HY	Male	2019-02-10	Jefferson Parish	LA	0.975288	NEG	N/A
19-201	Dendrocygna autumnalis	HY	Female	2019-02-10	Jefferson Parish	LA	0.85832	NEG	N/A
19-202	Dendrocygna autumnalis	HY	Female	2019-02-10	Jefferson Parish	LA	0.870023	NEG	N/A
19-203	Dendrocygna autumnalis	AHY	Female	2019-02-10	Jefferson Parish	LA	0.446458	NEG	N/A
19-204	Dendrocygna autumnalis	HY	Female	2019-02-10	Jefferson Parish	LA	0.541186	NEG	N/A
19-205	Dendrocygna autumnalis	HY	Female	2019-02-10	Jefferson Parish	LA	0.942339	NEG	N/A
19-206	Dendrocygna autumnalis	HY	Female	2019-02-10	Jefferson Parish	LA	0.811367	NEG	N/A
19-207	Dendrocygna autumnalis	AHY	Female	2019-02-10	Jefferson Parish	LA	0.898682	NEG	N/A
19-208	Dendrocygna autumnalis	AHY	Female	2019-02-10	Jefferson Parish	LA	0.332784	NEG	N/A
19-209	Dendrocygna autumnalis	HY	Female	2019-02-10	Jefferson Parish	LA	0.772652	NEG	N/A
19-210	Dendrocygna autumnalis	HY	Female	2019-02-10	Jefferson Parish	LA	0.469522	NEG	N/A
19-211	Dendrocygna autumnalis	HY	Male	2019-02-10	Jefferson Parish	LA	0.757002	NEG	N/A
19-212	Dendrocygna autumnalis	AHY	Female	2019-02-10	Jefferson Parish	LA	1.02224	NEG	N/A
19-213	Dendrocygna autumnalis	AHY	Male	2019-02-10	Jefferson Parish	LA	1.27348	NEG	N/A
19-214	Dendrocygna autumnalis	HY	Male	2019-02-10	Jefferson Parish	LA	0.80313	NEG	N/A
19-215	Dendrocygna autumnalis	HY	Female	2019-02-10	Jefferson Parish	LA	0.753707	NEG	N/A
19-216	Dendrocygna autumnalis	AHY	Male	2019-02-10	Jefferson Parish	LA	0.994234	NEG	N/A
19-217	Dendrocygna autumnalis	AHY	Female	2019-02-10	Jefferson Parish	LA	0.803954	NEG	N/A
19-218	Dendrocygna autumnalis	HY	Female	2019-02-10	Jefferson Parish	LA	0.620264	NEG	N/A
19-219	Dendrocygna autumnalis	HY	Male	2019-02-10	Jefferson Parish	LA	0.797364	NEG	N/A
19-220	Dendrocygna autumnalis	AHY	Female	2019-02-10	Jefferson Parish	LA	0.800659	NEG	N/A
19-221	Dendrocygna autumnalis	HY	Female	2019-02-10	Jefferson Parish	LA	0.805601	NEG	N/A
19-222	Dendrocygna autumnalis	AHY	Male	2019-02-10	Jefferson Parish	LA	0.825371	NEG	N/A
19-223	Dendrocygna autumnalis	HY	Female	2019-02-10	Jefferson Parish	LA	0.50659	NEG	N/A
19-224	Dendrocygna autumnalis	HY	Female	2019-02-10	Jefferson Parish	LA	0.728171	NEG	N/A
19-225	Dendrocygna autumnalis	HY	Male	2019-02-10	Jefferson Parish	LA	0.860081	NEG	N/A
19-226	Dendrocygna autumnalis	AHY	Female	2019-02-10	Jefferson Parish	LA	0.890195	NEG	N/A
19-227	Dendrocygna autumnalis	HY	Female	2019-02-10	Jefferson Parish	LA	0.375321	NEG	N/A
19-228	Dendrocygna autumnalis	HY	Female	2019-02-10	Jefferson Parish	LA	0.478884	NEG	N/A
19-229	Dendrocygna autumnalis	AHY	Female	2019-02-10	Jefferson Parish	LA	1.06574	NEG	N/A
19-230	Dendrocygna autumnalis	HY	Male	2019-02-10	Jefferson Parish	LA	0.94675	NEG	N/A
19-231	Dendrocygna autumnalis	AHY	Female	2019-02-10	Jefferson Parish	LA	0.827763	NEG	N/A
19-232	Dendrocygna autumnalis	AHY	Male	2019-02-10	Jefferson Parish	LA	0.673522	NEG	N/A
19-233	Dendrocygna autumnalis	HY	Male	2019-02-10	Jefferson Parish	LA	0.901946	NEG	N/A
19-234	Dendrocygna autumnalis	HY	Female	2019-02-10	Jefferson Parish	LA	0.890144	NEG	N/A
19-235	Dendrocygna autumnalis	HY	Male	2019-02-10	Jefferson Parish	LA	0.584649	NEG	N/A
19-236	Dendrocygna autumnalis	AHY	Female	2019-02-10	Jefferson Parish	LA	0.693353	NEG	N/A
19-237	Dendrocygna autumnalis	AHY	Female	2019-02-10	Jefferson Parish	LA	1.2357	NEG	N/A
19-238	Dendrocygna autumnalis	HY	Female	2019-02-10	Jefferson Parish	LA	0.999633	NEG	N/A
19-239	Dendrocygna autumnalis	AHY	Female	2019-02-10	Jefferson Parish	LA	0.104297	NEG	N/A
19-240	Dendrocygna autumnalis	HY	Male	2019-02-10	Jefferson Parish	LA	0.92545	NEG	N/A
19-241	Dendrocygna autumnalis	HY	Male	2019-02-10	Jefferson Parish	LA	1.60264	NEG	N/A
19-242	Dendrocygna autumnalis	HY	Male	2019-02-10	Jefferson Parish	LA	0.949688	NEG	N/A
19-243	Dendrocygna autumnalis	HY	Female	2019-02-10	Jefferson Parish	LA	0.93511	NEG	N/A
19-244	Dendrocygna autumnalis	HY	Female	2019-02-10	Jefferson Parish	LA	0.809541	NEG	N/A
19-245	Dendrocygna autumnalis	HY	Male	2019-02-10	Jefferson Parish	LA	0.592073	NEG	N/A
1 Unknown (UNK); age (column C) or sex (column D) were not indicated for this samples
2 Hatch year (HY)
3 After hatch year (AHY)
4 Louisiana (LA)
5 Negative (NEG)
6 Positive (POS)
7 Not applicable (N/A)
